# Supplementary material for: Assessing the influence of soil freeze–thaw cycles on catchment water storage–flux–age interactions using a tracer-aided ecohydrological model
Source: Copernicus journal article supplement (doi:10.5194/hess-23-3319-2019), 2019-08-13
Supplement: Supplementary file 1 [file hess-23-3319-2019-supplement.zip]

Archive with 2 entries (2 files):
- hess-23-3319-2019-supplement-title-page.pdf
- HESS_Supplementary_Revision.docx
