# Supplementary material for: Assessing the influence of soil freeze–thaw cycles on catchment water storage–flux–age interactions using a tracer-aided ecohydrological model
Source: Copernicus journal article supplement (doi:10.5194/hess-23-3319-2019), 2019-08-13
Supplement: Supplementary file 1 [file hess-23-3319-2019-supplement.zip › hess-23-3319-2019-supplement-title-page.pdf]

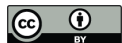

## *Supplement of*

# **Assessing the influence of soil freeze–thaw cycles on catchment water storage–flux–age interactions using a tracer-aided ecohydrological model**

**Aaron Smith et al.**

*Correspondence to:* Aaron Smith ([smith@igb-berlin.de](mailto:smith@igb-berlin.de))

- [hess-23-3319-2019-supplement-title-page.pdf](#)
- [HESS\\_Supplementary\\_Revision.docx](#)

The copyright of individual parts of the supplement might differ from the CC BY 4.0 License.
